1 **COVID-19 coronavirus vaccine design using reverse vaccinology and machine**  
2 **learning**

3

4 **Edison Ong<sup>1</sup>, Mei U Wong<sup>2</sup>, Anthony Huffman<sup>1</sup>, Yongqun He<sup>1,2\*</sup>**

5

6 <sup>1</sup> Department of Computational Medicine and Bioinformatics, University of Michigan, Ann  
7 Arbor, MI 48109, USA

8 <sup>2</sup> Unit for Laboratory Animal Medicine, Department of Microbiology and Immunology,  
9 University of Michigan, Ann Arbor, MI 48109, USA

10

11

12 \*Corresponding authors:

13 Yongqun He: [yongqunh@med.umich.edu](mailto:yongqunh@med.umich.edu)

## 14 **Abstract**

15 To ultimately combat the emerging COVID-19 pandemic, it is desired to develop an  
16 effective and safe vaccine against this highly contagious disease caused by the SARS-CoV-2  
17 coronavirus. Our literature and clinical trial survey showed that the whole virus, as well as the  
18 spike (S) protein, nucleocapsid (N) protein, and membrane protein, have been tested for vaccine  
19 development against SARS and MERS. We further used the Vaxign reverse vaccinology tool  
20 and the newly developed Vaxign-ML machine learning tool to predict COVID-19 vaccine  
21 candidates. The N protein was found to be conserved in the more pathogenic strains  
22 (SARS/MERS/COVID-19), but not in the other human coronaviruses that mostly cause mild  
23 symptoms. By investigating the entire proteome of SARS-CoV-2, six proteins, including the S  
24 protein and five non-structural proteins (nsp3, 3CL-pro, and nsp8-10) were predicted to be  
25 adhesins, which are crucial to the viral adhering and host invasion. The S, nsp3, and nsp8  
26 proteins were also predicted by Vaxign-ML to induce high protective antigenicity. Besides the  
27 commonly used S protein, the nsp3 protein has not been tested in any coronavirus vaccine  
28 studies and was selected for further investigation. The nsp3 was found to be more conserved  
29 among SARS-CoV-2, SARS-CoV, and MERS-CoV than among 15 coronaviruses infecting  
30 human and other animals. The protein was also predicted to contain promiscuous MHC-I and  
31 MHC-II T-cell epitopes, and linear B-cell epitopes localized in specific locations and functional  
32 domains of the protein. Our predicted vaccine targets provide new strategies for effective and  
33 safe COVID-19 vaccine development.

34

35

## 36 **Introduction**

37 The emerging Coronavirus Disease 2019 (COVID-19) pandemic poses a massive crisis to  
38 global public health. As of March 11, 2020, there were 118,326 confirmed cases and 4,292  
39 deaths, according to the World Health Organization (WHO), and WHO declared the COVID-19  
40 as a pandemic on the same day. The causative agent of the COVID-19 disease is the severe acute  
41 respiratory syndrome coronavirus 2 (SARS-CoV-2). Coronaviruses can cause animal diseases  
42 such as avian infectious bronchitis caused by the infectious bronchitis virus (IBV), and pig  
43 transmissible gastroenteritis caused by a porcine coronavirus<sup>1</sup>. Bats are commonly regarded as  
44 the natural reservoir of coronaviruses, which can be transmitted to humans and other animals

45 after genetic mutations. There are seven known human coronaviruses, including the novel  
46 SARS-CoV-2. Four of them (HCoV-HKU1, HCoV-OC43, HCoV-229E, and HCoV-NL63) have  
47 been circulating in the human population worldwide and cause mild symptoms<sup>2</sup>. Coronavirus  
48 became prominence after Severe acute respiratory syndrome (SARS) and Middle East  
49 Respiratory Syndrome (MERS) outbreaks. In 2003, the SARS disease caused by the SARS-  
50 associated coronavirus (SARS-CoV) infected over 8,000 people worldwide and was contained in  
51 the summer of 2003<sup>3</sup>. SARS-CoV-2 and SARS-CoV share high sequence identity<sup>4</sup>. The MERS  
52 disease infected more than 2,000 people, which is caused by the MERS-associated coronavirus  
53 (MERS-CoV) and was first reported in Saudi Arabia and spread to several other countries since  
54 2012<sup>5</sup>.

55         There is no human vaccine on the market to prevent COVID-19, and there is an urgent  
56 need to develop a safe and effective vaccine to prevent this highly infectious disease.  
57 Coronaviruses are positively-stranded RNA viruses with its genome packed inside the  
58 nucleocapsid (N) protein and enveloped by the membrane (M) protein, envelope (E) protein, and  
59 the spike (S) protein<sup>6</sup>. While many coronavirus vaccine studies targeting different structural  
60 proteins were conducted, most of these efforts eventually ceased soon after the outbreak of  
61 SARS and MERS. With the recent COVID-19 pandemic outbreak, it is urgent to resume the  
62 coronavirus vaccine research. As the immediate response to the ongoing pandemic, the first  
63 testing in humans of the mRNA-based vaccine targeting the S protein of SARS-CoV-2  
64 (ClinicalTrials.gov Identifier: NCT04283461, Table 1) started on March 16, 2020. As the most  
65 superficial and protrusive protein of the coronaviruses, S protein plays a crucial role in mediating  
66 virus entry. In the SARS vaccine development, the full-length S protein and its S1 subunit  
67 (which contains receptor binding domain) have been frequently used as the vaccine antigens due  
68 to their ability to induce neutralizing antibodies that prevent host cell entry and infection.  
69 However, studies showed that S protein-based vaccination did not provide full protection and  
70 sometimes raise safety concerns<sup>7,8</sup>. In the meantime, many other research groups and companies  
71 are also putting great efforts into developing and manufacture COVID-19 vaccines.

72         In recent years, the development of vaccine design has been revolutionized by the reverse  
73 vaccinology (RV), which aims to first identify promising vaccine candidate through  
74 bioinformatics analysis of the pathogen genome. RV has been successfully applied to vaccine  
75 discovery for pathogens such as Group B meningococcus and led to the license Bexsero

76 vaccine<sup>9</sup>. Among current RV prediction tools<sup>10,11</sup>, Vaxign is the first web-based RV program<sup>12</sup>  
77 and has been used to successfully predict vaccine candidates against different bacterial and viral  
78 pathogens<sup>13-15</sup>. Recently we have also developed a machine learning approach called Vaxign-ML  
79 to enhance prediction accuracy<sup>16</sup>.

80 In this study, we first surveyed the existing coronavirus vaccine development status, and  
81 then applied the Vaxign RV and Vaxign-ML approaches to predict COVID-19 protein  
82 candidates for vaccine development. We identified six possible adhesins, including the structural  
83 S protein and five other non-structural proteins, and three of them (S, nsp3, and nsp8 proteins)  
84 were predicted to induce high protective immunity. The S protein was predicted to have the  
85 highest protective antigenicity score and it has been extensively studied as the target of  
86 coronavirus vaccines by other researchers. Here we selected nsp3 protein as an alternative  
87 vaccine candidate, which was predicted to have the second-highest protective antigenicity score  
88 yet, has not been considered in any vaccine studies. We investigated the sequence conservation  
89 and immunogenicity of the multi-domain nsp3 protein as a vaccine candidate.

90

## 91 **Results**

92

### 93 **Published research and clinical trial coronavirus vaccine studies**

94 To better understand the current status of coronavirus vaccine development, we  
95 systematically surveyed the development of vaccines for coronavirus from the ClinicalTrials.gov  
96 database and PubMed literature (as of March 17, 2020). Extensive effort has been made to  
97 develop a safe and effective vaccine against SARS or MERS, and the most advance clinical trial  
98 study is currently at phase II (Table 1). It is a challenging task to quickly develop a safe and  
99 effective vaccine for the on-going COVID-19 pandemic.

100 There are two primary design strategies for coronavirus vaccine development: the usage  
101 of the whole virus or genetically engineered vaccine antigens that can be delivered through  
102 different formats. The whole virus vaccines include inactivated<sup>17</sup> or live attenuated vaccines<sup>18,19</sup>  
103 (Table 2). The two live attenuated SARS vaccines mutated the exoribonuclease and envelop  
104 protein to reduce the virulence and/or replication capability of the SARS-CoV. Overall, the  
105 whole virus vaccines can induce a strong immune response and protect against coronavirus  
106 infections. Genetically engineered vaccines that target specific coronavirus protein are often used

107 to improve vaccine safety and efficacy. The coronavirus antigens such as S protein, N protein,  
108 and M protein can be delivered as recombinant DNA vaccine and viral vector vaccine (Table 2).

109

### 110 **N protein is conserved among SARS-CoV-2, SARS-CoV, and MERS-CoV, but missing from** 111 **the other four human coronaviruses causing mild symptoms**

112 We first used the Vaxign analysis framework<sup>12,16</sup> to compare the full proteomes of seven  
113 human coronavirus strains (SARS-CoV-2, SARS-CoV, MERS-CoV, HCoV-229E, HCoV-  
114 OC43, HCoV-NL63, and HCoV-HKU1). The proteins of SARS-CoV-2 were used as the seed for  
115 the pan-genomic comparative analysis. The Vaxign pan-genomic analysis reported only the N  
116 protein in SARS-CoV-2 having high sequence similarity among the more severe form of  
117 coronavirus (SARS-CoV and MERS-CoV), while having low sequence similarity among the  
118 more typically mild HCoV-229E, HCoV-OC43, HCoV-NL63, and HCoV-HKU1. The sequence  
119 conservation suggested the potential of N protein as a candidate for the cross-protective vaccine  
120 against SARS and MERS. The N protein was also evaluated and used for vaccine development  
121 (Table 2). The N protein packs the coronavirus RNA to form the helical nucleocapsid in virion  
122 assembly. This protein is more conserved than the S protein and was reported to induce an  
123 immune response and neutralize coronavirus infections<sup>20</sup>. However, a study also showed the  
124 linkage between N protein and severe pneumonia or other serious liver failures related to the  
125 pathogenesis of SARS<sup>21</sup>.

126

### 127 **Six adhesive proteins in SARS-CoV-2 identified as potential vaccine targets**

128 The Vaxign RV analysis predicted six SARS-CoV-2 proteins (S protein, nsp3, 3CL-PRO,  
129 and nsp8-10) as adhesive proteins (Table 3). Adhesin plays a critical role in the virus adhering to  
130 the host cell and facilitating the virus entry to the host cell<sup>22</sup>, which has a significant association  
131 with the vaccine-induced protection<sup>23</sup>. In SARS-CoV-2, S protein was predicted to be adhesin,  
132 matching its primary role in virus entry. The structure of SARS-CoV-2 S protein was determined<sup>24</sup>  
133 and reported to contribute to the host cell entry by interacting with the angiotensin-converting  
134 enzyme 2 (ACE2)<sup>25</sup>. Besides S protein, the other five predicted adhesive proteins were all non-  
135 structural proteins. In particular, nsp3 is the largest non-structural protein of SARS-CoV-2  
136 comprises various functional domains<sup>26</sup>.

137

### 138 **Three adhesin proteins were predicted to induce strong protective immunity**

139 The Vaxign-ML pipeline computed the protegenicity (protective antigenicity) score and  
140 predicted the induction of protective immunity by a vaccine candidate<sup>16</sup>. The training data  
141 consisted of viral protective antigens, which were tested to be protective in at least one animal  
142 challenge model<sup>27</sup>. The performance of the Vaxign-ML models was evaluated (Table S1 and  
143 Figure S1), and the best performing model had a weighted F1-score of 0.94. Using the optimized  
144 Vaxign-ML model, we predicted three proteins (S protein, nsp3, and nsp8) as vaccine candidates  
145 with significant protegenicity scores (Table 3). The S protein was predicted to have the highest  
146 protegenicity score, which is consistent with the experimental observations reported in the  
147 literature. The nsp3 protein is the second most promising vaccine candidate besides S protein.  
148 There was currently no study of nsp3 as a vaccine target. The structure and functions of this protein  
149 have various roles in coronavirus infection, including replication and pathogenesis (immune  
150 evasion and virus survival)<sup>26</sup>. Therefore, we selected nsp3 for further investigation, as described  
151 below.

152

### 153 **Nsp3 as a vaccine candidate**

154 The multiple sequence alignment and the resulting phylogeny of nsp3 protein showed that  
155 this protein in SARS-CoV-2 was more closely related to the human coronaviruses SARS-CoV and  
156 MERS-CoV, and bat coronaviruses BtCoV/HKU3, BtCoV/HKU4, and BtCoV/HKU9. We studied  
157 the genetic conservation of nsp3 protein (Figure 1A) in seven human coronaviruses and eight  
158 coronaviruses infecting other animals (Table S2). The five human coronaviruses, SARS-CoV-2,  
159 SARS-CoV, MERS-CoV, HCoV-HKU1, and HCoV-OC43, belong to the beta-coronavirus while  
160 HCoV-229E and HCoV-NL63 belong to the alpha-coronavirus. The HCoV-HKU1 and HCoV-  
161 OC43, as the human coronavirus with mild symptoms clustered together with murine MHV-A59.  
162 The more severe form of human coronavirus SARS-CoV-2, SARS-CoV, and MERS-CoV grouped  
163 with three bat coronaviruses BtCoV/HKU3, BtCoV/HKU4, and BtCoV/HKU9.

164 When evaluating the amino acid conservations relative to the functional domains in nsp3,  
165 all protein domains, except the hypervariable region (HVR), macro-domain 1 (MAC1) and beta-  
166 coronavirus-specific marker  $\beta$ SM, showed higher conservation in SARS-CoV-2, SARS-CoV, and  
167 MERS-CoV (Figure 1B). The amino acid conservation between the major human coronavirus  
168 (SARS-CoV-2, SARS-CoV, and MERS-CoV) was plotted and compared to all 15 coronaviruses

169 used to generate the phylogenetic of nsp3 protein (Figure 1B). The SARS-CoV domains were also  
170 plotted (Figure 1B), with the relative position in the multiple sequence alignment (MSA) of all 15  
171 coronaviruses (Table S3 and Figure S2).

172 The immunogenicity of nsp3 protein in terms of T cell MHC-I & MHC-II and linear B cell  
173 epitopes was also investigated. There were 28 and 42 promiscuous epitopes predicted to bind the  
174 reference MHC-I & MHC-II alleles, which covered the majority of the world population,  
175 respectively (Table S4-5). In terms of linear B cell epitopes, there were 14 epitopes with BepiPred  
176 scores over 0.55 and had at least ten amino acids in length (Table S6). The 3D structure of SARS-  
177 CoV-2 protein was plotted and highlighted with the T cell MHC-I & MHC-II, and linear B cell  
178 epitopes (Figure 2). The predicted B cell epitopes were more likely located in the distal region of  
179 the nsp3 protein structure. Most of the predicted MHC-I & MHC-II epitopes were embedded inside  
180 the protein. The sliding averages of T cell MHC-I & MHC-II and linear B cell epitopes were  
181 plotted with respect to the tentative SARS-CoV-2 nsp3 protein domains using SARS-CoV nsp3  
182 protein as a reference (Figure 3). The ubiquitin-like domain 1 and 2 (Ubl1 and Ubl2) only predicted  
183 to have MHC-I epitopes. The Domain Preceding Ubl2 and PL2-PRO (DPUP) domain had only  
184 predicted MHC-II epitopes. The PL2-PRO contained both predicted MHC-I and MHC-II epitopes,  
185 but not B cell epitopes. In particular, the TM1, TM2, and AH1 were predicted helical regions with  
186 high T cell MHC-I and MHC-II epitopes<sup>28</sup>. The TM1 and TM2 are transmembrane regions passing  
187 the endoplasmic reticulum (ER) membrane. The HVR, MAC2, MAC3, nucleic-acid binding  
188 domain (NAB),  $\beta$ SM, Nsp3 ectodomain; (3Ecto), Y1, and CoV-Y domain contained predicted B  
189 cell epitopes. Finally, the Vaxign RV framework also predicted 2 regions (position 251-260 and  
190 329-337) in the MAC1 domain of nsp3 domain having high sequence similarity to the human  
191 mono-ADP-ribosyltransferase PARP14 (NP\_060024.2).

192

## 193 Discussion

194 Our prediction of the potential SARS-CoV-2 antigens, which could induce protective  
195 immunity, provides a timely analysis for the vaccine development against COVID-19. Currently,  
196 most coronavirus vaccine studies use the whole inactivated or attenuated virus, or target the  
197 structural proteins such as the spike (S) protein, nucleocapsid (N) protein, and membrane (M)  
198 protein (Table 2). But the inactivated or attenuated whole virus vaccine might induce strong  
199 adverse events. On the other hand, vaccines targeting the structural proteins induce a strong



200 immune response<sup>20,29,30</sup>. In some studies, these structural proteins, including the S and N proteins,  
201 were reported to associate with the pathogenesis of coronavirus<sup>21,31</sup> and might raise safety concern.  
202 A study has shown increased liver pathology in the vaccinated ferrets immunized with modified  
203 vaccinia Ankara-S recombinant vaccine<sup>32</sup>. Although there were no other adverse events reported  
204 in other animal studies, the safety and efficacy of these vaccination strategies has not been tested  
205 in human clinical trials. Our study applied the state-of-the-art Vaxign reserve vaccinology (RV)  
206 and Vaxign-ML machine learning strategies to the entire SARS-CoV-2 proteomes including both  
207 structural and non-structural proteins for vaccine candidate prediction. Our results indicate for the  
208 first time that many non-structural proteins could be used as potential vaccine candidates.

209 The SARS-CoV-2 S protein was identified by our Vaxign and Vaxign-ML analysis as the  
210 most favorable vaccine candidate. First, the Vaxign RV framework predicted the S protein as a  
211 likely adhesin, which is consistent with the role of S protein for the invasion of host cells. Second,  
212 our Vaxign-ML predicted that the S protein had a high protective antigenicity score. These results  
213 confirmed the role of S protein as the important target of COVID-19 vaccines. However, the S  
214 protein exists in many coronaviruses, and many non-pathogenic human coronaviruses also use S  
215 protein to cell invasion. For example, despite markedly weak pathogenicity, HCoV-NL63 also  
216 uses S protein and employs the angiotensin-converting enzyme 2 (ACE2) for cellular entry<sup>33</sup>. This  
217 suggests that the S protein is not the only factor determining the infection level of a human  
218 coronavirus. In addition, targeting only the S protein may induce high serum-neutralizing antibody  
219 titers but cannot induce sufficient protective efficacy<sup>34</sup>. Thus, alternative vaccine antigens may be  
220 considered.

221 The SARS-CoV-2 nsp3 protein was predicted to be a potential vaccine candidate, as shown  
222 by its predicted second-highest protective antigenicity score, adhesin property, promiscuous  
223 MHC-I & MHC-II T cell epitopes, and B cell epitopes. The nsp3 is the largest non-structural  
224 protein that includes multiple functional domains to support viral pathogenesis<sup>26</sup>. The multiple  
225 sequence alignment of nsp3 also showed higher sequence conservation in most of the functional  
226 domains in SARS-CoV-2, SARS-CoV, and MERS-CoV, than in all 15 coronavirus strains (Fig.  
227 1B). The induction of nsp3-specific immunity would likely help the host to fight against the  
228 infection. Besides the S and nsp3 proteins, our study also suggested four additional vaccine  
229 candidates, including 3CL-pro, nsp8, nsp9, and nsp10. All these proteins were predicted as  
230 adhesins, and the nsp8 protein was also predicted to have a significant protective antigenicity score.



231 Our predicted non-structural proteins (nsp3, 3CL-pro, nsp8, nsp9, and nsp10) are not part  
232 of the viral structural particle, and none of the non-structural proteins have been evaluated as  
233 vaccine candidates. The SARS/MERS/COVID-19 vaccine studies so far target the structural  
234 (S/M/N) proteins. Still, the non-structural proteins have been used effective vaccine antigens to  
235 stimulate protective immunity against many viruses. For example, the non-structural protein NS1  
236 was found to induce protective immunity against the infections by flaviviruses<sup>35</sup>. The non-  
237 structural proteins of the hepatitis C virus were reported to induce HCV-specific vigorous and  
238 broad-spectrum T-cell responses<sup>36</sup>. The non-structural HIV-1 gene products were also shown to  
239 be valuable targets for prophylactic or therapeutic vaccines<sup>37</sup>. Therefore, it is reasonable to  
240 consider the SARS-CoV-2 non-structural proteins as possible vaccine targets, as suggested by the  
241 present study.

242 Instead of using a single protein as the vaccine antigen, we would like to propose the  
243 development of a “cocktail vaccine” as an effective strategy for COVID-19 vaccine development.  
244 A typical cocktail vaccine includes more than one antigen to cover different aspects of  
245 protection<sup>39,40</sup>. The licensed Group B meningococcus Bexsero vaccine, which was developed via  
246 reverse vaccinology, contains three protein antigens<sup>9</sup>. To develop an efficient and safe COVID-19  
247 cocktail vaccine, it is possible to mix the structural (e.g., S protein) and non-structural (e.g., nsp3)  
248 viral proteins. The other proteins identified in our study may also be considered as possible vaccine  
249 targets. The benefit of a cocktail vaccine strategy could induce immunity that can protect the host  
250 against not only the S-ACE2 interaction and viral entry to the host cells, but also protect against  
251 the accessory non-structural adhesin proteins (e.g., nsp3), which might also be vital to the viral  
252 entry and replication. The usage of more than one antigen allows us to reduce the volume of each  
253 antigen and thus reducing the induction of adverse events. Nonetheless, the potentials of these  
254 predicted non-structural protein targets in vaccine development need to be experimentally  
255 validated.

256 For rational COVID-19 vaccine development, it is critical to understand the fundamental  
257 host-coronavirus interaction and protective immune mechanism<sup>7</sup>. Such understanding may not  
258 only provide us guidance in terms of antigen selection but also facilitate our design of vaccine  
259 formulations. For example, an important foundation of our prediction in this study is based on our  
260 understanding of the critical role of adhesin as a virulence factor as well as protective antigen. The  
261 choice of DNA vaccine, recombinant vaccine vector, and another method of vaccine formulation

262 is also deeply rooted in our understanding of pathogen-specific immune response induction.  
263 Different experimental conditions may also affect results<sup>41,42</sup>. Therefore, it is crucial to understand  
264 the underlying molecular and cellular mechanisms for rational vaccine development.

265

## 266 **Methods**

267 **Annotation of literature and database records.** We annotated peer-reviewed journal articles  
268 stored in the PubMed database and the ClinicalTrials.gov database. From the peer-reviewed  
269 articles, we identified and annotated those coronavirus vaccine candidates that were  
270 experimentally studied and found to induce protective neutralizing antibody or provided immunity  
271 against virulent pathogen challenge.

272

273 **Vaxign prediction.** The SARS-CoV-2 sequence was obtained from NCBI. All the proteins of six  
274 known human coronavirus strains, including SARS-CoV, MERS-CoV, HCoV-229E, HCoV-  
275 OC43, HCoV-NL63, and HCoV-HKU1 were extracted from Uniprot proteomes<sup>43</sup>. The full  
276 proteomes of these seven coronaviruses were then analyzed using the Vaxign reverse vaccinology  
277 pipeline<sup>12,16</sup>. The Vaxign program predicted several biological features, including adhesin  
278 probability<sup>44</sup>, transmembrane helix<sup>45</sup>, orthologous proteins<sup>46</sup>, and protein functions<sup>12,16</sup>.

279

280 **Vaxign-ML prediction.** The ML-based RV prediction model was build following a similar  
281 methodology described in the Vaxign-ML<sup>16</sup>. Specifically, the positive samples in the training data  
282 included 397 bacterial and 178 viral protective antigens (PAgs) recorded in the Protegen database<sup>27</sup>  
283 after removing homologous proteins with over 30% sequence identity. There were 4,979 negative  
284 samples extracted from the corresponding pathogens' Uniprot proteomes<sup>43</sup> with sequence dis-  
285 similarity to the PAgs, as described in previous studies<sup>47-49</sup>. Homologous proteins in the negative  
286 samples were also removed. The proteins in the resulting dataset were annotated with biological  
287 and physicochemical features. The biological features included adhesin probability<sup>44</sup>,  
288 transmembrane helix<sup>45</sup>, and immunogenicity<sup>50</sup>. The physicochemical features included the  
289 compositions, transitions and distributions<sup>51</sup>, quasi-sequence-order<sup>52</sup>, Moreau-Broto auto-  
290 correlation<sup>53,54</sup> and Geary auto-correlation<sup>55</sup> of various physicochemical properties such as charge,  
291 hydrophobicity, polarity, and solvent accessibility<sup>56</sup>. Five supervised ML classification algorithms,  
292 including logistic regression, support vector machine, k-nearest neighbor, random forest<sup>57</sup>, and

293 extreme gradient boosting (XGB)<sup>58</sup> were trained on the annotated proteins dataset. The  
294 performance of these models was evaluated using a nested five-fold cross-validation (N5CV)  
295 based on the area under receiver operating characteristic curve, precision, recall, weighted F1-  
296 score, and Matthew's correlation coefficient. The best performing XGB model was selected to  
297 predict the proteogenicity score of all SARS-CoV-2 isolate Wuhan-Hu-1 (GenBank ID:  
298 MN908947.3) proteins, downloaded from NCBI. A protein with proteogenicity score over 0.9 is  
299 considered as strong vaccine immunity induction (weighted F1-score > 0.94 in N5CV).

300

301 **Phylogenetic analysis.** The protein nsp3 was selected for further investigation. The nsp3 proteins  
302 of 14 coronaviruses besides SARS-CoV-2 were downloaded from the Uniprot (Table S2). Multiple  
303 sequence alignment of these nsp3 proteins was performed using MUSCLE<sup>59</sup> and visualized via  
304 SEAVIEW<sup>60</sup>. The phylogenetic tree was constructed using PhyML<sup>61</sup>, and the amino acid  
305 conservation was estimated by the Jensen-Shannon Divergence (JSD)<sup>62</sup>. The JSD score was also  
306 used to generate a sequence conservation line using the nsp3 protein sequences from 4 or 13  
307 coronaviruses.

308

309 **Immunogenicity analysis.** The immunogenicity of the nsp3 protein was evaluated by the  
310 prediction of T cell MHC-I and MHC-II, and linear B cell epitopes. For T cell MHC-I epitopes,  
311 the IEDB consensus method was used to predicting promiscuous epitopes binding to 4 out of 27  
312 MHC-I reference alleles with consensus percentile ranking less than 1.0 score<sup>50</sup>. For T cell MHC-  
313 II epitopes, the IEDB consensus method was used to predicting promiscuous epitopes binding to  
314 more than half of the 27 MHC-II reference alleles with consensus percentile ranking less than 10.0.  
315 The MHC-I and MHC-II reference alleles covered a wide range of human genetic variation  
316 representing the majority of the world population<sup>63,64</sup>. The linear B cell epitopes were predicted  
317 using the BepiPred 2.0 with a cutoff of 0.55 score<sup>65</sup>. Linear B cell epitopes with at least ten amino  
318 acids were mapped to the predicted 3D structure of SARS-CoV-2 nsp3 protein visualized via  
319 PyMol<sup>66</sup>. The predicted count of T cell MHC-I and MHC-II epitopes, and the predicted score of  
320 linear B cell epitopes were computed as the sliding averages with a window size of ten amino acids.  
321 The nsp3 protein 3D structure was predicted using C-I-Tasser<sup>67</sup> available in the Zhang Lab  
322 webserver (<https://zhanglab.ccmb.med.umich.edu/C-I-TASSER/2019-nCov/>).

323

## 324 **References**

- 325 1. Perlman, S. & Netland, J. Coronaviruses post-SARS: Update on replication and  
326 pathogenesis. *Nature Reviews Microbiology* (2009). doi:10.1038/nrmicro2147
- 327 2. Cabeça, T. K., Granato, C. & Bellei, N. Epidemiological and clinical features of human  
328 coronavirus infections among different subsets of patients. *Influenza Other Respi. Viruses*  
329 (2013). doi:10.1111/irv.12101
- 330 3. Lu, R. *et al.* Genomic characterisation and epidemiology of 2019 novel coronavirus:  
331 implications for virus origins and receptor binding. *Lancet* (2020). doi:10.1016/S0140-  
332 6736(20)30251-8
- 333 4. Lai, C.-C., Shih, T.-P., Ko, W.-C., Tang, H.-J. & Hsueh, P.-R. Severe acute respiratory  
334 syndrome coronavirus 2 (SARS-CoV-2) and coronavirus disease-2019 (COVID-19): The  
335 epidemic and the challenges. *Int. J. Antimicrob. Agents* (2020).  
336 doi:10.1016/j.ijantimicag.2020.105924
- 337 5. Chan, J. F. W. *et al.* Middle East Respiratory syndrome coronavirus: Another zoonotic  
338 betacoronavirus causing SARS-like disease. *Clin. Microbiol. Rev.* (2015).  
339 doi:10.1128/CMR.00102-14
- 340 6. Li, F. Structure, Function, and Evolution of Coronavirus Spike Proteins. *Annu. Rev. Virol.*  
341 (2016). doi:10.1146/annurev-virology-110615-042301
- 342 7. Roper, R. L. & Rehm, K. E. SARS vaccines: Where are we? *Expert Review of Vaccines*  
343 (2009). doi:10.1586/erv.09.43
- 344 8. de Wit, E., van Doremalen, N., Falzarano, D. & Munster, V. J. SARS and MERS: recent  
345 insights into emerging coronaviruses. *Nat. Rev. Microbiol.* **14**, 523–534 (2016).
- 346 9. Folaranmi, T., Rubin, L., Martin, S. W., Patel, M. & MacNeil, J. R. Use of Serogroup B  
347 Meningococcal Vaccines in Persons Aged  $\geq 10$  Years at Increased Risk for Serogroup B  
348 Meningococcal Disease: Recommendations of the Advisory Committee on Immunization  
349 Practices, 2015. *MMWR Morb Mortal Wkly Rep* **64**, 608–612 (2015).
- 350 10. He, Y. *et al.* Emerging vaccine informatics. *J. Biomed. Biotechnol.* **2010**, (2010).
- 351 11. Dalsass, M., Brozzi, A., Medini, D. & Rappuoli, R. Comparison of Open-Source Reverse  
352 Vaccinology Programs for Bacterial Vaccine Antigen Discovery. *Front. Immunol.* **10**, 1–  
353 12 (2019).
- 354 12. He, Y., Xiang, Z. & Mobley, H. L. T. Vaxign: The first web-based vaccine design program

- 355 for reverse vaccinology and applications for vaccine development. *J. Biomed. Biotechnol.*  
356 **2010**, (2010).
- 357 13. Xiang, Z. A. &He, Y. O. Genome-wide prediction of vaccine targets for human herpes  
358 simplex viruses using Vaxign reverse vaccinology Human Herpes Simplex ( HSV )  
359 Viruses. **14**, 1–10 (2013).
- 360 14. Singh, R., Garg, N., Shukla, G., Capalash, N. &Sharma, P. Immunoprotective Efficacy of  
361 *Acinetobacter baumannii* Outer Membrane Protein, FilF, Predicted In silico as a Potential  
362 Vaccine Candidate. *Front. Microbiol.* **7**, (2016).
- 363 15. Navarro-Quiroz, E. *et al.* Prediction of Epitopes in the Proteome of *Helicobacter pylori*.  
364 *Glob. J. Health Sci.* **10**, 148 (2018).
- 365 16. Ong, E. *et al.* Vaxign-ML: Supervised Machine Learning Reverse Vaccinology Model for  
366 Improved Prediction of Bacterial Protective Antigens. *Bioinformatics* (2020).
- 367 17. See, R. H. *et al.* Comparative evaluation of two severe acute respiratory syndrome  
368 (SARS) vaccine candidates in mice challenged with SARS coronavirus. *J. Gen. Virol.*  
369 (2006). doi:10.1099/vir.0.81579-0
- 370 18. Graham, R. L. *et al.* A live, impaired-fidelity coronavirus vaccine protects in an aged,  
371 immunocompromised mouse model of lethal disease. *Nat. Med.* (2012).  
372 doi:10.1038/nm.2972
- 373 19. Fett, C., DeDiego, M. L., Regla-Nava, J. A., Enjuanes, L. &Perlman, S. Complete  
374 Protection against Severe Acute Respiratory Syndrome Coronavirus-Mediated Lethal  
375 Respiratory Disease in Aged Mice by Immunization with a Mouse-Adapted Virus Lacking  
376 E Protein. *J. Virol.* (2013). doi:10.1128/jvi.00087-13
- 377 20. Zhao, P. *et al.* Immune responses against SARS-coronavirus nucleocapsid protein induced  
378 by DNA vaccine. *Virology* (2005). doi:10.1016/j.virol.2004.10.016
- 379 21. Yasui, F. *et al.* Prior Immunization with Severe Acute Respiratory Syndrome (SARS)-  
380 Associated Coronavirus (SARS-CoV) Nucleocapsid Protein Causes Severe Pneumonia in  
381 Mice Infected with SARS-CoV. *J. Immunol.* (2008). doi:10.4049/jimmunol.181.9.6337
- 382 22. Ribet, D. &Cossart, P. How bacterial pathogens colonize their hosts and invade deeper  
383 tissues. *Microbes Infect.* **17**, 173–183 (2015).
- 384 23. Ong, E., Wong, M. U. &He, Y. Identification of New Features from Known Bacterial  
385 Protective Vaccine Antigens Enhances Rational Vaccine Design. *Front. Immunol.* **8**, 1–11

- 386 (2017).
- 387 24. Wrapp, D. *et al.* Cryo-EM structure of the 2019-nCoV spike in the prefusion  
388 conformation. *Science* (2020). doi:10.1126/science.abb2507
- 389 25. Letko, M., Marzi, A. & Munster, V. Functional assessment of cell entry and receptor usage  
390 for SARS-CoV-2 and other lineage B betacoronaviruses. *Nat. Microbiol.* (2020).  
391 doi:10.1038/s41564-020-0688-y
- 392 26. Lei, J., Kusov, Y. & Hilgenfeld, R. Nsp3 of coronaviruses: Structures and functions of a  
393 large multi-domain protein. *Antiviral Research* **149**, 58–74 (2018).
- 394 27. Yang, B., Sayers, S., Xiang, Z. & He, Y. Protegen: A web-based protective antigen  
395 database and analysis system. *Nucleic Acids Res.* **39**, 1073–1078 (2011).
- 396 28. Rothbard, J. B. & Taylor, W. R. A sequence pattern common to T cell epitopes. *EMBO J.*  
397 (1988). doi:10.1002/j.1460-2075.1988.tb02787.x
- 398 29. Shi, S. Q. *et al.* The expression of membrane protein augments the specific responses  
399 induced by SARS-CoV nucleocapsid DNA immunization. *Mol. Immunol.* (2006).  
400 doi:10.1016/j.molimm.2005.11.005
- 401 30. Al-Amri, S. S. *et al.* Immunogenicity of Candidate MERS-CoV DNA Vaccines Based on  
402 the Spike Protein. *Sci. Rep.* (2017). doi:10.1038/srep44875
- 403 31. Glansbeek, H. L. *et al.* Adverse effects of feline IL-12 during DNA vaccination against  
404 feline infectious peritonitis virus. *J. Gen. Virol.* (2002). doi:10.1099/0022-1317-83-1-1
- 405 32. Weingartl, H. *et al.* Immunization with Modified Vaccinia Virus Ankara-Based  
406 Recombinant Vaccine against Severe Acute Respiratory Syndrome Is Associated with  
407 Enhanced Hepatitis in Ferrets. *J. Virol.* (2004). doi:10.1128/jvi.78.22.12672-12676.2004
- 408 33. Hofmann, H. *et al.* Human coronavirus NL63 employs the severe acute respiratory  
409 syndrome coronavirus receptor for cellular entry. *Proc. Natl. Acad. Sci. U. S. A.* (2005).  
410 doi:10.1073/pnas.0409465102
- 411 34. See, R. H. *et al.* Severe acute respiratory syndrome vaccine efficacy in ferrets: Whole  
412 killed virus and adenovirus-vectored vaccines. *J. Gen. Virol.* (2008).  
413 doi:10.1099/vir.0.2008/001891-0
- 414 35. Salat, J. *et al.* Tick-borne encephalitis virus vaccines contain non-structural protein 1  
415 antigen and may elicit NS1-specific antibody responses in vaccinated individuals.  
416 *Vaccines* (2020). doi:10.3390/vaccines8010081



- 417 36. Ip, P. P. *et al.* Alphavirus-based vaccines encoding nonstructural proteins of hepatitis c  
418 virus induce robust and protective T-cell responses. *Mol. Ther.* (2014).  
419 doi:10.1038/mt.2013.287
- 420 37. Cafaro, A. *et al.* Anti-tat immunity in HIV-1 infection: Effects of naturally occurring and  
421 vaccine-induced antibodies against tat on the course of the disease. *Vaccines* (2019).  
422 doi:10.3390/vaccines7030099
- 423 38. Züst, R. *et al.* Coronavirus non-structural protein 1 is a major pathogenicity factor:  
424 Implications for the rational design of coronavirus vaccines. *PLoS Pathog.* (2007).  
425 doi:10.1371/journal.ppat.0030109
- 426 39. Sealy, R. *et al.* Preclinical and clinical development of a multi-envelope, DNA-virus-  
427 protein (D-V-P) HIV-1 vaccine. *International Reviews of Immunology* (2009).  
428 doi:10.1080/08830180802495605
- 429 40. Millet, P. *et al.* Immunogenicity of the Plasmodium falciparum asexual blood-stage  
430 synthetic peptide vaccine SPf66. *Am. J. Trop. Med. Hyg.* (1993).  
431 doi:10.4269/ajtmh.1993.48.424
- 432 41. He, Y. *et al.* Updates on the web-based VIOLIN vaccine database and analysis system.  
433 *Nucleic Acids Res.* **42**, 1124–1132 (2014).
- 434 42. Ong, E. *et al.* VIO: Ontology classification and study of vaccine responses given various  
435 experimental and analytical conditions. *BMC Bioinformatics* (2019). doi:10.1186/s12859-  
436 019-3194-6
- 437 43. The UniProt Consortium. The Universal Protein Resource (UniProt). *Nucleic Acids Res.*  
438 **36**, D193-7 (2008).
- 439 44. Sachdeva, G., Kumar, K., Jain, P. & Ramachandran, S. SPAAN: A software program for  
440 prediction of adhesins and adhesin-like proteins using neural networks. *Bioinformatics* **21**,  
441 483–491 (2005).
- 442 45. Krogh, A., Larsson, B., vonHeijne, G. & Sonnhammer, E. L. . Predicting transmembrane  
443 protein topology with a hidden Markov model: application to complete genomes. *J Mol*  
444 *Biol* **305**, 567–580 (2001).
- 445 46. Li, L., Stoeckert, C. J. & Roos, D. S. OrthoMCL: Identification of ortholog groups for  
446 eukaryotic genomes. *Genome Res.* (2003). doi:10.1101/gr.1224503
- 447 47. Bowman, B. N. *et al.* Improving reverse vaccinology with a machine learning approach.



- 448 *Vaccine* **29**, 8156–8164 (2011).
- 449 48. Doytchinova, I. a & Flower, D. R. VaxiJen: a server for prediction of protective antigens,  
450 tumour antigens and subunit vaccines. *BMC Bioinformatics* **8**, 4 (2007).
- 451 49. Heinson, A. I. *et al.* Enhancing the biological relevance of machine learning classifiers for  
452 reverse vaccinology. *Int. J. Mol. Sci.* **18**, (2017).
- 453 50. Fleri, W. *et al.* The immune epitope database and analysis resource in epitope discovery  
454 and synthetic vaccine design. *Front. Immunol.* **8**, 1–16 (2017).
- 455 51. Dubchak, I., Muchnik, I., Holbrook, S. R. & Kim, S. H. Prediction of protein folding class  
456 using global description of amino acid sequence. *Proc. Natl. Acad. Sci. U. S. A.* **92**, 8700–  
457 8704 (1995).
- 458 52. Chou, K.-C. Prediction of Protein Subcellular Locations by Incorporating Quasi-  
459 Sequence-Order Effect. *Biochem. Biophys. Res. Commun.* **278**, 477–483 (2000).
- 460 53. Lin, Z. & Pan, X. M. Accurate prediction of protein secondary structural content. *Protein*  
461 *J.* **20**, 217–220 (2001).
- 462 54. Feng, Z. P. & Zhang, C. T. Prediction of membrane protein types based on the  
463 hydrophobic index of amino acids. *J. Protein Chem.* **19**, 269–275 (2000).
- 464 55. Sokal, R. R. & Thomson, B. A. Population structure inferred by local spatial  
465 autocorrelation: An example from an Amerindian tribal population. *Am. J. Phys.*  
466 *Anthropol.* **129**, 121–131 (2006).
- 467 56. Ong, S. A. K., Lin, H. H., Chen, Y. Z., Li, Z. R. & Cao, Z. Efficacy of different protein  
468 descriptors in predicting protein functional families. *BMC Bioinformatics* **8**, 1–14 (2007).
- 469 57. Pedregosa, F. *et al.* Scikit-learn: Machine Learning in Python. *J. Mach. Learn. Res.* **12**,  
470 2825–2830 (2012).
- 471 58. Chen, T. & Guestrin, C. XGBoost: A scalable tree boosting system. *Proc. ACM SIGKDD*  
472 *Int. Conf. Knowl. Discov. Data Min.* **13-17-Aug**, 785–794 (2016).
- 473 59. Edgar, R. C. MUSCLE: Multiple sequence alignment with high accuracy and high  
474 throughput. *Nucleic Acids Res.* (2004). doi:10.1093/nar/gkh340
- 475 60. Gouy, M., Guindon, S. & Gascuel, O. Sea view version 4: A multiplatform graphical user  
476 interface for sequence alignment and phylogenetic tree building. *Mol. Biol. Evol.* (2010).  
477 doi:10.1093/molbev/msp259
- 478 61. Lefort, V., Longueville, J. E. & Gascuel, O. SMS: Smart Model Selection in PhyML. *Mol.*

- 479 *Biol. Evol.* (2017). doi:10.1093/molbev/msx149
- 480 62. Capra, J. A. & Singh, M. Predicting functionally important residues from sequence  
481 conservation. *Bioinformatics* (2007). doi:10.1093/bioinformatics/btm270
- 482 63. Greenbaum, J. *et al.* Functional classification of class II human leukocyte antigen (HLA)  
483 molecules reveals seven different supertypes and a surprising degree of repertoire sharing  
484 across supertypes. *Immunogenetics* **63**, 325–335 (2013).
- 485 64. Weiskopf, D. *et al.* Comprehensive analysis of dengue virus-specific responses supports  
486 an HLA-linked protective role for CD8+ T cells. *Proc. Natl. Acad. Sci. U. S. A.* **110**,  
487 E2046-53 (2013).
- 488 65. Jespersen, M. C., Peters, B., Nielsen, M. & Marcatili, P. BepiPred-2.0: Improving  
489 sequence-based B-cell epitope prediction using conformational epitopes. *Nucleic Acids*  
490 *Res.* **45**, W24–W29 (2017).
- 491 66. Schrödinger, L. The PyMol Molecular Graphics System, Versión 1.8. *Thomas Holder*  
492 (2015). doi:10.1007/s13398-014-0173-7.2
- 493 67. Zheng, W. *et al.* Deep-learning contact-map guided protein structure prediction in  
494 CASP13. *Proteins Struct. Funct. Bioinforma.* (2019). doi:10.1002/prot.25792

## 497 **Acknowledgments**

498 This work has been supported by the NIH-NIAID grant 1R01AI081062.

## 500 **Author contributions**

501 EO and YH contributed to the study design. EO, MW, AH collected the data. EO performed  
502 bioinformatics analysis. EO, MW, and YH wrote the manuscript. All authors performed result  
503 interpretation, and discussed and reviewed the manuscript.

504  
505 **Competing financial interests:** The authors declare no competing financial interests.

## 506 **Figure Legends**

507

508 **Figure 1.** The phylogeny and sequence conservation of coronavirus nsp3. (A) Phylogeny of 15  
509 strains based on the nsp3 protein sequence alignment and phylogeny analysis. (B) The  
510 conservation of nsp3 among different coronavirus strains. The red line represents the  
511 conservation among the four strains (SARS-CoV, SARS-CoV-2, MERS, and BtCoV-HKU3).  
512 The blue line was generated using all the 15 strains. The bottom part represents the nsp3 peptides  
513 and their sizes. The phylogenetically close four strains have more conserved nsp3 sequences than  
514 all the strains being considered.

515

516 **Figure 2.** Predicted 3D structure of nsp3 protein highlighted with (A) MHC-I T cell epitopes  
517 (red), (B) MHC-II (blue) T cell epitopes, (C) linear B cell epitopes (green), and the merged  
518 epitopes. MHC-I epitopes are more internalized, MHC-II epitopes are more mixed, and B cells  
519 are more shown on the surface.

520

521 **Figure 3.** Immunogenic region of nsp3 between SARS-CoV-2 and the four conservation strains.  
522 (A) MHC-I (red) T cell epitope (B) MHC-II (blue) T cell epitope (C) linear B cell epitope  
523 (green).

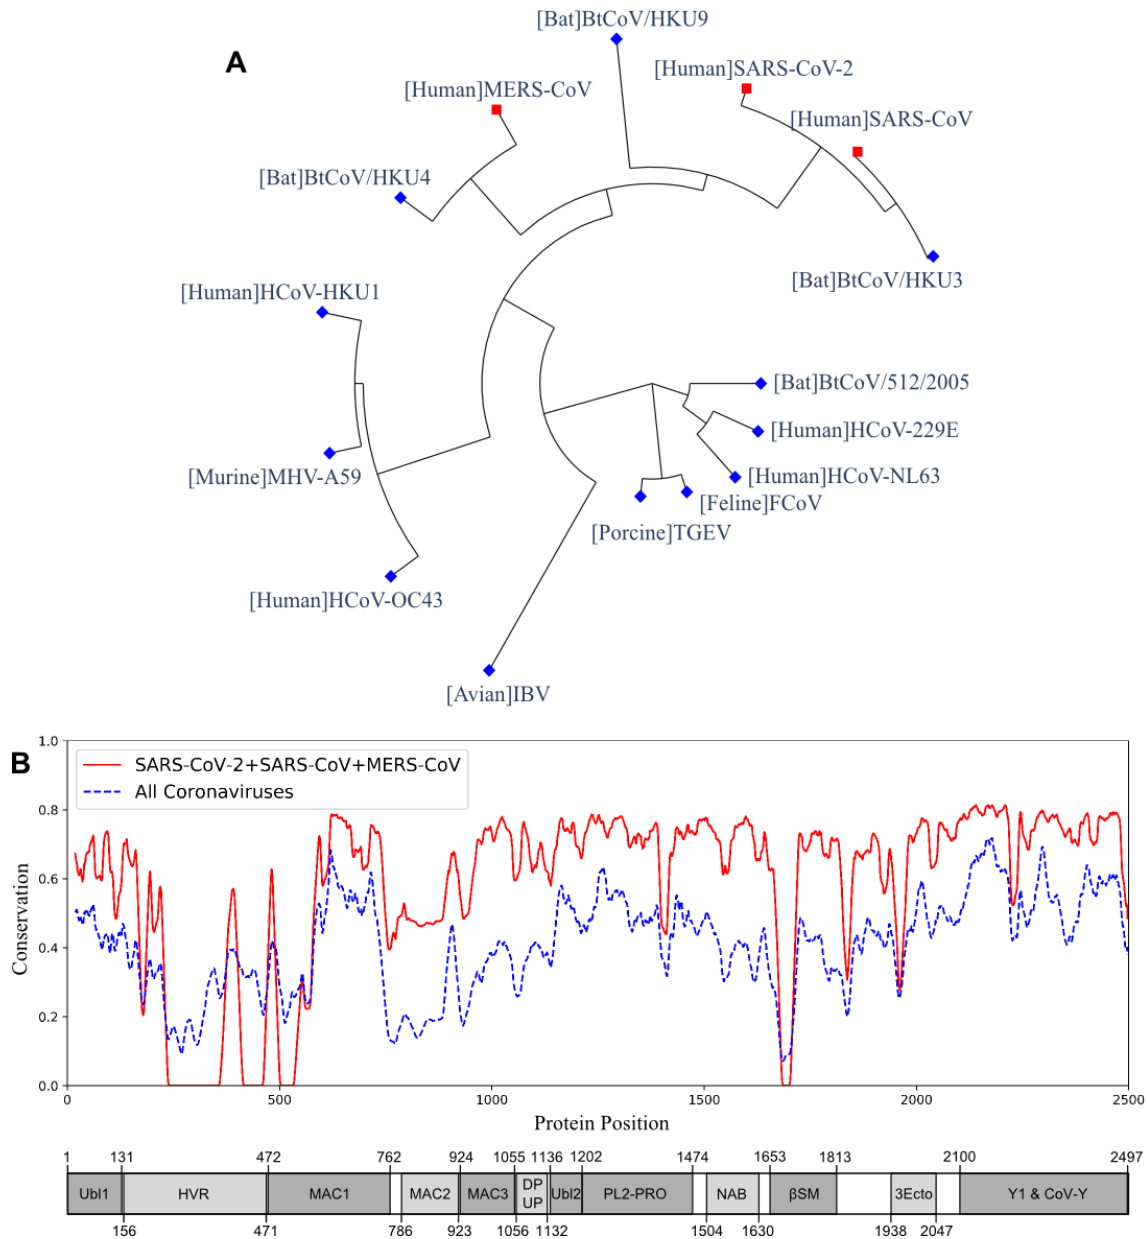

524

525 **Figure 1.** The phylogeny and sequence conservation of coronavirus nsp3. (A) Phylogeny of 15  
 526 strains based on the nsp3 protein sequence alignment and phylogeny analysis. (B) The  
 527 conservation of nsp3 among different coronavirus strains. The red line represents the  
 528 conservation among the four strains (SARS-CoV, SARS-CoV-2, MERS, and BtCoV-HKU3).  
 529 The blue line was generated using all the 15 strains. The bottom part represents the nsp3 peptides  
 530 and their sizes. The phylogenetically close four strains have more conserved nsp3 sequences than  
 531 all the strains being considered.

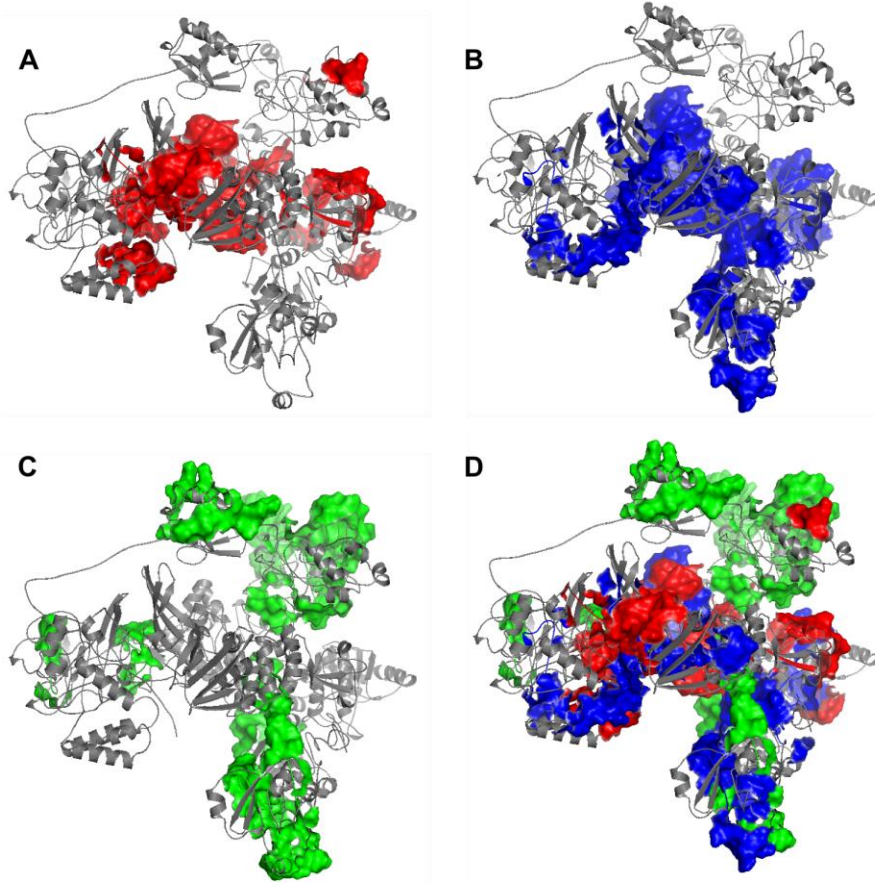

532

533

534 **Figure 2.** Predicted 3D structure of nsp3 protein highlighted with (A) MHC-I T cell epitopes

535 (red), (B) MHC-II (blue) T cell epitopes, (C) linear B cell epitopes (green), and the merged

536 epitopes. MHC-I epitopes are more internalized, MHC-II epitopes are more mixed, and B cells

537 are more shown on the surface.

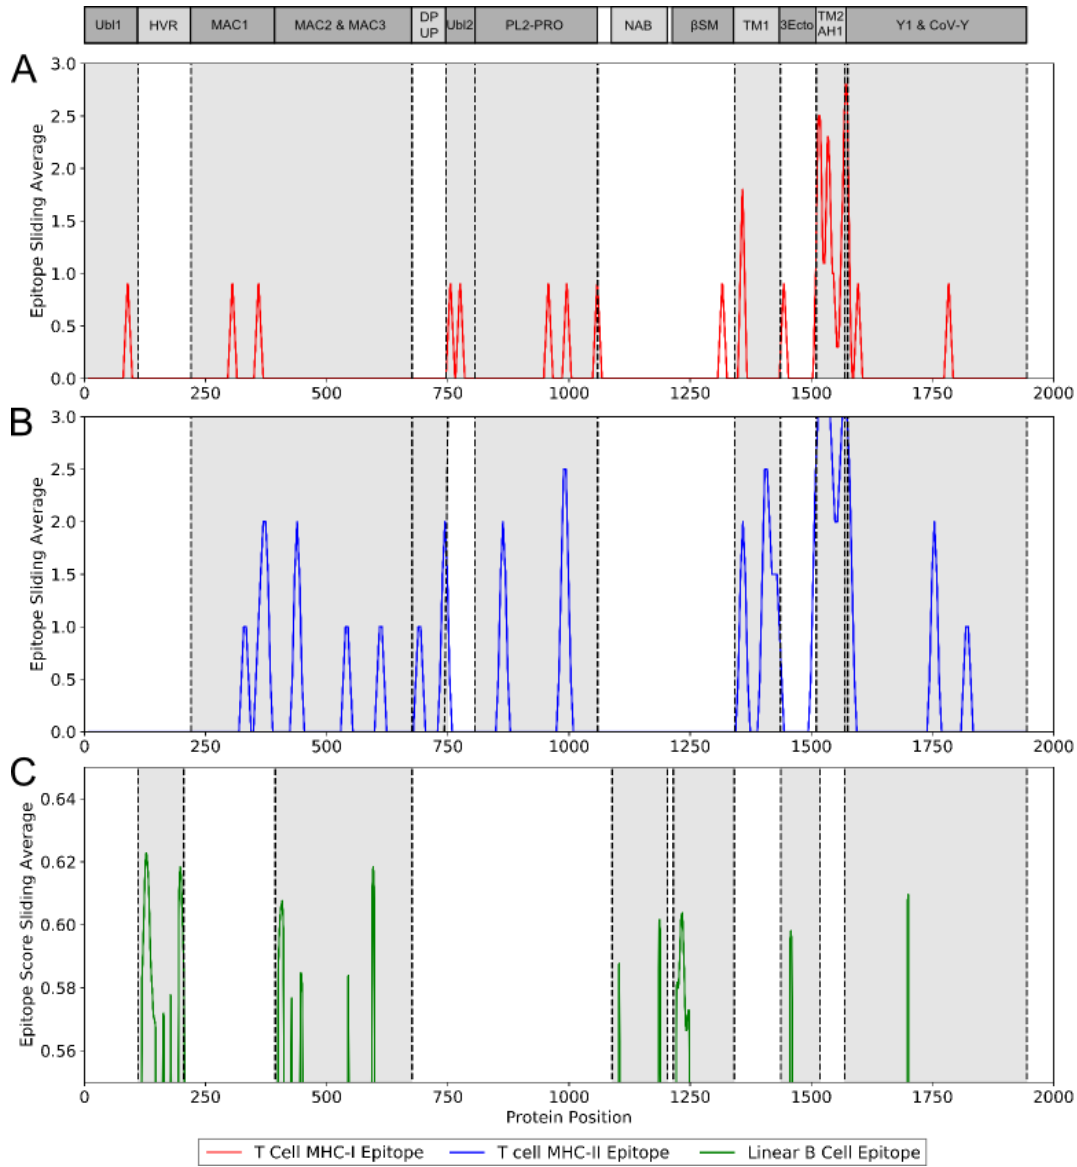

538

539

540 **Figure 3.** Immunogenic region of nsp3 between SARS-CoV-2 and the four conservation strains.

541 (A) MHC-I (red) T cell epitope (B) MHC-II (blue) T cell epitope (C) linear B cell epitope

542 (green).

543 **Table 1.** Reported SARS-CoV, MERS-CoV, SARS-CoV-2 vaccine clinical trials.

| <b>Virus</b> | <b>Location</b>     | <b>Phase</b> | <b>Year</b> | <b>Identifier</b> | <b>Vaccine Type</b>                     |
|--------------|---------------------|--------------|-------------|-------------------|-----------------------------------------|
| SARS-CoV     | United States       | I            | 2004        | NCT00099463       | recombinant DNA vaccine (S protein)     |
| SARS-CoV     | United States       | I            | 2007        | NCT00533741       | whole virus vaccine                     |
| SARS-CoV     | United States       | I            | 2011        | NCT01376765       | recombinant protein vaccine (S protein) |
| MERS         | United Kingdom      | I            | 2018        | NCT03399578       | vector vaccine (S protein)              |
| MERS         | Germany             | I            | 2018        | NCT03615911       | vector vaccine (S protein)              |
| MERS         | Saudi Arabia        | I            | 2019        | NCT04170829       | vector vaccine (S protein)              |
| MERS         | Germany, Netherland | I            | 2019        | NCT04119440       | vector vaccine (S protein)              |
| MERS         | Russia              | I,II         | 2019        | NCT04128059       | vector vaccine (protein not specified)  |
| MERS         | Russia              | I,II         | 2019        | NCT04130594       | vector vaccine (protein not specified)  |
| SARS-CoV2    | United States       | I            | 2020        | NCT04283461       | mRNA-based vaccine (S protein)          |

544



545 **Table 2.** Vaccines tested for SARS-CoV and MERS-CoV.

| Vaccine name                                        | Vaccine type      | Antigen     | PMID     |
|-----------------------------------------------------|-------------------|-------------|----------|
| <b>SARS vaccines</b>                                |                   |             |          |
| CTLA4-S DNA vaccine                                 | DNA               | S           | 15993989 |
| <i>Salmonella</i> -CTLA4-S DNA vaccine              | DNA               | S           | 15993989 |
| <i>Salmonella</i> -tPA-S DNA vaccine                | DNA               | S           | 15993989 |
| Recombinant spike polypeptide vaccine               | Recombinant       | S           | 15993989 |
| N protein DNA vaccine                               | DNA               | N           | 15582659 |
| M protein DNA vaccine                               | DNA               | M           | 16423399 |
| N protein DNA vaccine                               | DNA               | N           | 16423399 |
| N+M protein DNA vaccine                             | DNA               | N, M        | 16423399 |
| tPA-S DNA vaccine                                   | DNA               | S           | 15993989 |
| $\beta$ -propiolactone-inactivated SARS-CoV vaccine | Inactivated virus | whole virus | 16476986 |
| MA-ExoN vaccine                                     | Live attenuated   | MA-ExoN     | 23142821 |
| rMA15- $\Delta$ E vaccine                           | Live attenuated   | MA15        | 23576515 |
| Ad S/N vaccine                                      | Viral vector      | S,N         | 16476986 |
| ADS-MVA vaccine                                     | Viral vector      | S           | 15708987 |
| MVA/S vaccine                                       | Viral vector      | S           | 15096611 |
| <b>MERS vaccines</b>                                |                   |             |          |
| England1 S DNA Vaccine                              | DNA               | S           | 26218507 |
| MERS-CoV pcDNA3.1-S1 DNA vaccine                    | DNA               | S           | 28314561 |
| Inactivated whole MERS-CoV (IV) vaccine             | Inactivated virus | whole virus | 29618723 |
| England1 S DNA +England1 S protein subunit Vaccine  | Mixed             | S1          | 26218507 |
| England1 S1 protein subunit Vaccine                 | Subunit           | S1          | 26218507 |
| MERS-CoV S vaccine                                  | Subunit           | S           | 29618723 |
| rNTD vaccine                                        | Subunit           | NTD of S    | 28536429 |
| rRBD vaccine                                        | Subunit           | RBD of S    | 28536429 |
| Ad5.MERS-S vaccine                                  | Viral vector      | S           | 25192975 |
| Ad5.MERS-S1 vaccine                                 | Viral vector      | S1 subunit  | 25192975 |
| VSV $\Delta$ G-MERS vaccine                         | Viral vector      | S           | 29246504 |

546 Abbreviation: S, surface glycoprotein; N, nucleocapsid phosphoprotein; M, membrane glycoprotein; Exon,  
547 exoribonuclease; NTD, N-terminal domain; RBD, receptor binding domain.

548 **Table 3.** Vaxign-ML Prediction and adhesin probability of all SARS-CoV-2 proteins.

|        | <b>Protein</b>              | <b>Vaxign-ML Score</b>              | <b>Adhesin Probability</b> |                          |
|--------|-----------------------------|-------------------------------------|----------------------------|--------------------------|
| orf1ab | nsp1                        | Host translation inhibitor          | 79.312                     |                          |
|        | nsp2                        | Non-structural protein 2            | 89.647                     |                          |
|        | nsp3                        | Non-structural protein 3            | <b>95.283*</b>             | <b>0.524<sup>#</sup></b> |
|        | nsp4                        | Non-structural protein 4            | 89.647                     | 0.289                    |
|        | 3CL-PRO                     | Proteinase 3CL-PRO                  | 89.647                     | <b>0.653<sup>#</sup></b> |
|        | nsp6                        | Non-structural protein 6            | 89.017                     | 0.320                    |
|        | nsp7                        | Non-structural protein 7            | 89.647                     | 0.269                    |
|        | nsp8                        | Non-structural protein 8            | <b>90.349*</b>             | <b>0.764<sup>#</sup></b> |
|        | nsp9                        | Non-structural protein 9            | 89.647                     | <b>0.796<sup>#</sup></b> |
|        | nsp10                       | Non-structural protein 10           | 89.647                     | <b>0.769<sup>#</sup></b> |
|        | RdRp                        | RNA-directed RNA polymerase         | 89.647                     | 0.229                    |
|        | Hel                         | Helicase                            | 89.647                     | 0.398                    |
|        | ExoN                        | Guanine-N7 methyltransferase        | 89.629                     | 0.183                    |
|        | NendoU                      | Uridylate-specific endoribonuclease | 89.647                     | 0.254                    |
|        | 2'-O-MT                     | 2'-O-methyltransferase              | 89.647                     | 0.421                    |
|        | S                           | Surface glycoprotein                | <b>97.623*</b>             | <b>0.635<sup>#</sup></b> |
|        | ORF3a                       | ORF3a                               | 66.925                     | 0.383                    |
|        | E                           | envelope protein                    | 23.839                     | 0.234                    |
|        | M                           | membrane glycoprotein               | 84.102                     | 0.282                    |
|        | ORF6                        | ORF6                                | 33.165                     | 0.095                    |
| ORF7   | ORF7a                       | 11.199                              | 0.451                      |                          |
| ORF8   | ORF8                        | 31.023                              | 0.311                      |                          |
| N      | nucleocapsid phosphoprotein | 89.647                              | 0.373                      |                          |
| ORF10  | ORF10                       | 6.266                               | 0.0                        |                          |

549 \* denotes Vaxign-ML predicted vaccine candidate.

550 # denotes predicted adhesin.
